# Supplementary material
Source: PubMed Central journal article supplement (PMC6591634)
Supplement: AAC.00113-19-s0001.pdf [file AAC.00113-19-s0001.pdf]

1 **Supplemental Material**

2

**Table S1.** MIC values of antibiotics against bacterial strains used in this study

| Strains                            | MIC (mg/L) |     |      |      |      |      |     |      |      |        |          |     |      |     |      |
|------------------------------------|------------|-----|------|------|------|------|-----|------|------|--------|----------|-----|------|-----|------|
|                                    | CST        | TGC | IPM  | MEM  | ETP  | CMZ  | CAZ | CTX  | FEP  | TZP    | SCF      | CZA | ATM  | CIP | AMK  |
| <i>K. pneumoniae</i> Y4            | 0.25       | 1   | >128 | >128 | >128 | >128 | 64  | >128 | >256 | >256/4 | >256/128 | 4/4 | >128 | >32 | >256 |
| <i>K. pneumoniae</i> Y4-<br>ΔmgrB  | 16         | 1   | 64   | >128 | >128 | >128 | 64  | >128 | >256 | >256/4 | >256/128 | 4/4 | >128 | >32 | >256 |
| <i>K. pneumoniae</i> Y17           | 64         | 8   | 64   | 64   | >128 | 128  | 32  | >128 | >256 | >256/4 | >256/128 | 2/4 | >128 | >32 | >256 |
| <i>K. pneumoniae</i> Y17-<br>ΔtetA | 64         | 2   | 64   | 128  | >128 | 128  | 32  | >128 | >256 | >256/4 | >256/128 | 2/4 | >128 | >32 | >256 |
| <i>K. pneumoniae</i> Y17-<br>ΔramR | 64         | 64  | 64   | >128 | >128 | >128 | 32  | >128 | >256 | >256/4 | >256/128 | 2/4 | >128 | >32 | >256 |

3 CST, colistin; TGC, Tigecycline; IPM, Imipenem; MEM, Meropenem; ETP, Ertapenem; CMZ, Cefmetazole; CAZ, Ceftazidime; CTX, Cefotaxime; FEP, Cefepime;  
 4 TZP, Piperacillin-tazobactam; SCF, Cefoperazone-sulbactam; CZA, Ceftazidime-avibactam; ATM, Aztreonam; CIP, Ciprofloxacin; AMK, Amikacin.

5

6

7

8

9

10

11

12

13 **Table S2.** Relative fold change in gene expression level of the RND efflux pumps and their transcriptional regulators in bacterial strains used  
 14 in this study

| Strains                                    | $\Delta\Delta Cq$ Expression<br>(mean $\pm$ StdDev) |                    |                   |                   |                    |                   |                   |                   |
|--------------------------------------------|-----------------------------------------------------|--------------------|-------------------|-------------------|--------------------|-------------------|-------------------|-------------------|
|                                            | <i>acrA</i>                                         | <i>acrB</i>        | <i>oqxA</i>       | <i>oqxB</i>       | <i>ramA</i>        | <i>rarA</i>       | <i>marA</i>       | <i>soxS</i>       |
| <i>K. pneumoniae</i><br>Y17                | 1.571 $\pm$ 0.266                                   | 1.645 $\pm$ 0.143  | 0.083 $\pm$ 0.007 | 2.045 $\pm$ 0.278 | 0.880 $\pm$ 0.037  | 0.005 $\pm$ 0.000 | 0.462 $\pm$ 0.030 | 8.741 $\pm$ 0.638 |
| <i>K. pneumoniae</i><br>Y17- $\Delta$ ramR | 7.982 $\pm$ 0.431                                   | 10.559 $\pm$ 1.145 | 0.780 $\pm$ 0.011 | 3.535 $\pm$ 0.498 | 46.886 $\pm$ 5.945 | 0.004 $\pm$ 0.000 | 0.246 $\pm$ 0.010 | 2.392 $\pm$ 0.104 |
| <i>K. pneumoniae</i><br>Y17- $\Delta$ tetA | 1.183 $\pm$ 0.018                                   | 1.400 $\pm$ 0.222  | 0.101 $\pm$ 0.016 | 1.844 $\pm$ 0.175 | 0.553 $\pm$ 0.047  | 0.013 $\pm$ 0.001 | 0.289 $\pm$ 0.019 | 3.512 $\pm$ 0.132 |

15

16

17

18

19

20

21

22

23

24

25

26

**Table S3.** Strains and Plasmids used in this study.

| Strain or Plasmid              | Description or genotype                                                                                                                              | Reference    |
|--------------------------------|------------------------------------------------------------------------------------------------------------------------------------------------------|--------------|
| <i>E. coli</i> DH5alpha        | F <sup>-</sup> Φ80lacZΔM15 Δ(lacZYA-argF) U169 recA1 endA1 hsdR17 (rK <sup>-</sup> , mK <sup>+</sup> ) phoA supE44 λ <sup>-</sup> thi-1 gyrA96 relA1 | Lab Stock    |
| <i>K. pneumoniae</i> Y4        | Wild-type clinically isolated <i>K. pneumoniae</i> strain Y4                                                                                         | <sup>1</sup> |
| <i>K. pneumoniae</i> Y4-ΔmgrB  | <i>K. pneumoniae</i> Y4 Δ <i>mgrB</i>                                                                                                                | This Study   |
| <i>K. pneumoniae</i> Y17       | Wild-type clinically isolated <i>K. pneumoniae</i> strain Y17                                                                                        | <sup>1</sup> |
| <i>K. pneumoniae</i> Y17-ΔramR | <i>K. pneumoniae</i> Y17 Δ <i>ramR</i>                                                                                                               | This Study   |
| <i>K. pneumoniae</i> Y17-ΔtetA | <i>K. pneumoniae</i> Y17 <i>tetA</i> W301 mutation to stop codon                                                                                     | This Study   |
| pCasKP-apr                     | Thermosensitive plasmid expresses Cas9 and lambda Red proteins in <i>K. pneumoniae</i> (Apr <sup>r</sup> )                                           | <sup>2</sup> |
| pSGKP-spe                      | Plasmid expressing sgRNA in <i>K. pneumoniae</i> (Spe <sup>r</sup> )                                                                                 | <sup>2</sup> |
| pSGKP-spe_mgrB                 | pSGKP-spe derivative with <i>mgrB</i> spacer                                                                                                         | This Study   |
| pSGKP-spe_ramR                 | pSGKP-spe derivative with <i>ramR</i> spacer                                                                                                         | This Study   |
| pBECKP-spe                     | <i>K. pneumoniae</i> base editing vector (Spe <sup>r</sup> )                                                                                         | <sup>2</sup> |
| pBECKP-spe_tetA                | pBECKP-spe derivative with <i>tetA</i> spacer                                                                                                        | This Study   |

27

28

29

30

31

**Table S4.** Primers used in this study.

| Gene                                                                 | Primer        | Sequence(5'~3')                                                                                 | Purpose                                                                            |
|----------------------------------------------------------------------|---------------|-------------------------------------------------------------------------------------------------|------------------------------------------------------------------------------------|
| <i>mgrB</i> gene deletion in the <i>K. pneumoniae</i> Y4 strain      | mgrB-spacer-F | tagtGCTTAACGTAATGTGCGACC                                                                        | <i>mgrB</i> spacer for gene deletion                                               |
|                                                                      | mgrB-spacer-R | aaacGGTCGCACATTACGTTAAGC                                                                        | <i>mgrB</i> spacer for gene deletion                                               |
|                                                                      | mgrB-seq-F    | TAACCGCTCAATAATACGCC                                                                            | amplification of <i>mgrB</i> locus from genome and sequencing of <i>mgrB</i> locus |
|                                                                      | mgrB-seq-R    | GCTCAGCCACATCCTCTTTC                                                                            | amplification of <i>mgrB</i> locus from genome                                     |
|                                                                      | mgrB-ssDNA    | GGCCGTGCTATCCTGGCGACATTGCGTACTGATGCGGAGAGTGGAT<br>AAGACATTTTTCTGCCGACTGATTTCTTCTGCGCCGCGGGTGG   | 90 nt <i>mgrB</i> repair template for gene deletion                                |
| <i>ramR</i> gene deletion in the <i>K. pneumoniae</i> Y17 strain     | ramR-spacer-F | tagtAAGAGAACGCGCGCAATATC                                                                        | <i>ramR</i> spacer for gene deletion                                               |
|                                                                      | ramR-spacer-R | aaacGATATTGCGCGCGTTCTCTT                                                                        | <i>ramR</i> spacer for gene deletion                                               |
|                                                                      | ramR-seq-F    | GTTGCTGCTGCGAGTAACAT                                                                            | amplification of <i>ramR</i> locus from genome and sequencing of <i>ramR</i> locus |
|                                                                      | ramR-seq-R    | TTCGGTAAACGGGTAGGTCA                                                                            | amplification of <i>ramR</i> locus from genome                                     |
|                                                                      | ramR-ssDNA    | GTGGCTCGTCCAAAGAGTGAAGATAAAAAGCAAGCGTTACTGGAA<br>AGAGCTTTCCGGAGCTCAACGAAATGTGCCAGCTGTCCGGTGAAAG | 90 nt <i>ramR</i> repair template for gene deletion                                |
| <i>tetA</i> gene W301 to stop in the <i>K. pneumoniae</i> Y17 strain | tetA-spacer-F | tagtCATCCATCCCCGTGTCGCGA                                                                        | <i>tetA</i> spacer for its W301 mutation to stop codon                             |
|                                                                      | tetA-spacer-R | aaacTCGCGACACGGGGATGGATG                                                                        | <i>tetA</i> spacer for its W301 mutation to stop codon                             |
|                                                                      | tetA-seq-F    | CCAACAGACCCCTGATCGTA                                                                            | amplification of <i>tetA</i> locus from genome and sequencing of <i>tetA</i> locus |
|                                                                      | tetA-seq-R    | GGCAGGCAGAGCAAGTAGAG                                                                            | amplification of <i>tetA</i> locus from genome                                     |

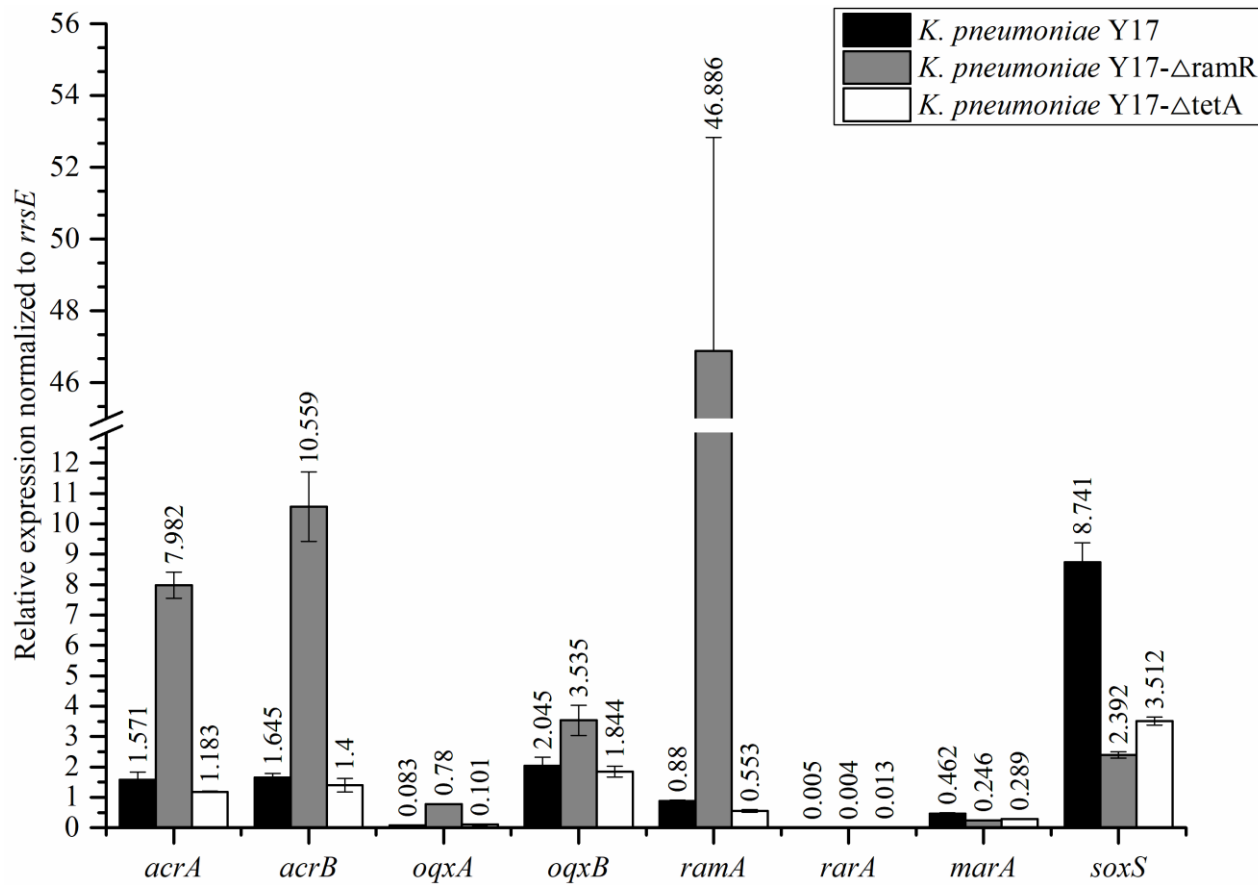

**Figure S1.** Relative fold change in gene expression level of the RND efflux pumps and their transcriptional regulators in bacterial strains used in this study.

## References

1. **Zhang R, Dong N, Huang Y, Zhou H, Xie M, Chan EW, Hu Y, Cai J, Chen S.** 2018. Evolution of tigecycline- and colistin-resistant CRKP (carbapenem-resistant *Klebsiella pneumoniae*) in vivo and its persistence in the GI tract. *Emerging microbes & infections* **7**:127.
2. **Wang Y, Wang S, Chen W, Song L, Zhang Y, Shen Z, Yu F, Li M, Ji Q.** 2018. CRISPR-Cas9 and CRISPR-Assisted Cytidine Deaminase Enable Precise and Efficient Genome Editing in *Klebsiella pneumoniae*. *Applied and environmental microbiology* **84**.
